# Supplementary material
Source: MDPI journal article supplement (https://www.mdpi.com/2304-6740/9/6/45)
Supplement: s1 [file s1]

Review

# Supplementary Materials: Volumetrics of Hydrogen Storage by Physical Adsorption

Sai Smruti Samantaray, Seth T. Putnam, and Nicholas P. Stadie\*

\*nstadie@montana.edu

## Table of Contents

|                                                     |       |
|-----------------------------------------------------|-------|
| S1. Data Analysis Methodology                       | p. 1  |
| S2. Benchmark Excess H <sub>2</sub> Adsorption Data | p. 2  |
| S3. Crystal Properties                              | p. 15 |
| S4. Powder and Pellet Properties                    | p. 17 |
| S5. Volumetric Approximations                       | p. 18 |
| S6. Porous Carbon Comparison                        | p. 19 |
| S7. Supporting References                           | p. 21 |

## S1. Data Analysis Methodology

All adsorption/desorption equilibria reported in this review were extracted from the original reference in the form of excess adsorption uptake only, using a Java applet (Data Thief III, v 1.7) or by communication directly with the main author(s). The data points are shown as coloured circles (powders) or x's (pellets) in **Figures 2-6** in the main text and **Figures S1-S26** herein.

The excess uptake data were subsequently fitted to a dual-site Langmuir (DSL) isotherm model (one isotherm at a time) using a squared residuals minimization method (via a nonlinear generalized reduced gradient algorithm):

$$n_e = (n_{max} - \rho_g[T, P] \cdot V_{max}) \left( (1 - \alpha) \left( \frac{K_1 P}{1 + K_1 P} \right) + \alpha \left( \frac{K_2 P}{1 + K_2 P} \right) \right)$$

The fit results are shown as semi-transparent coloured lines in **Figures 2-6** in the main text and **Figures S1-S26** herein. In general, no limitations were imposed on the fitting parameters to obtain the best fit. To reproduce the excess uptake of H<sub>2</sub> on the 9 Å single-layer graphene (SLG) slit pore model reported by Bénard and coworkers,<sup>1</sup> the maximum volume of the adsorbed phase,  $V_{max}$ , was imposed as 0.725.

## S2. Benchmark Excess H<sub>2</sub> Adsorption Data

### 2.1. MOF-5 Powder

Five references for H<sub>2</sub> adsorption on MOF-5 powder at 77 K are compared in **Figure S1**. The excess uptake reported by Ming and coworkers<sup>2</sup> was ultimately chosen for further analysis in this work.

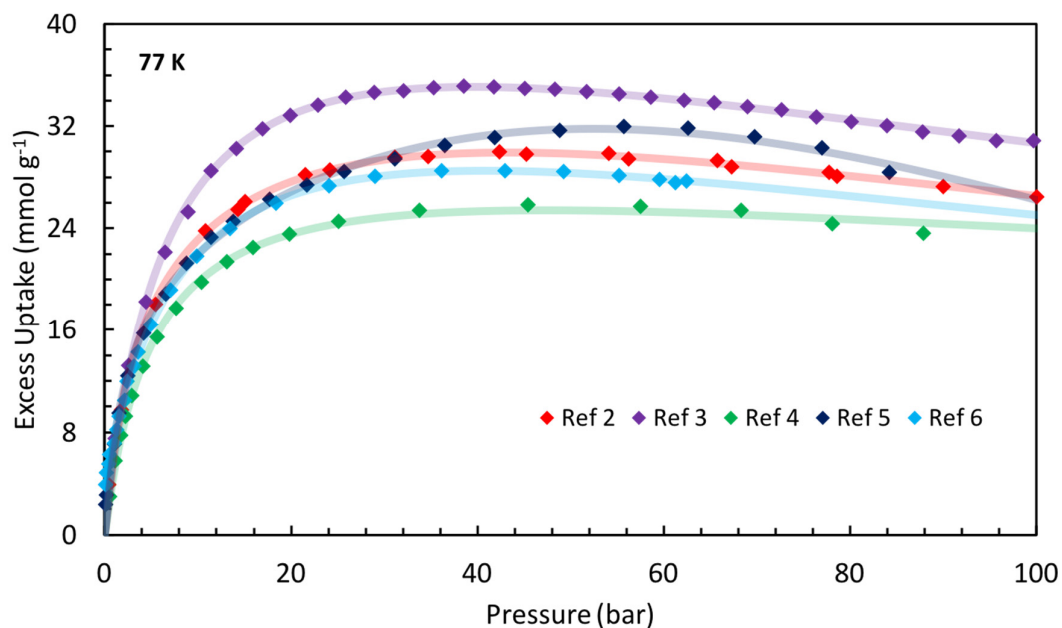

**Figure S1.** Excess H<sub>2</sub> adsorption uptake on MOF-5 powder at 77 K.<sup>2-6</sup>

One reference for H<sub>2</sub> adsorption on MOF-5 powder at 298 K was reviewed,<sup>7</sup> as shown in **Figure S2**.

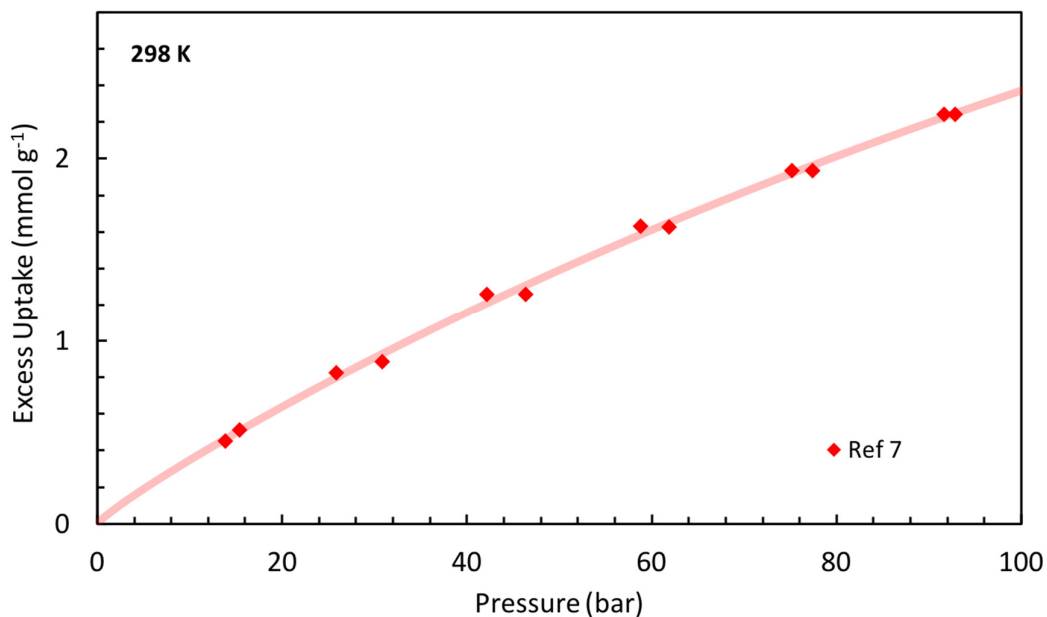

**Figure S2.** Excess H<sub>2</sub> adsorption uptake on MOF-5 powder at 298 K.<sup>7</sup>

## 2.2. MOF-177 Powder

Two references for H<sub>2</sub> adsorption on MOF-177 powder at 77 K are compared in **Figure S3**. The excess uptake reported by Zacharia and coworkers<sup>8</sup> was ultimately chosen for further analysis in this work.

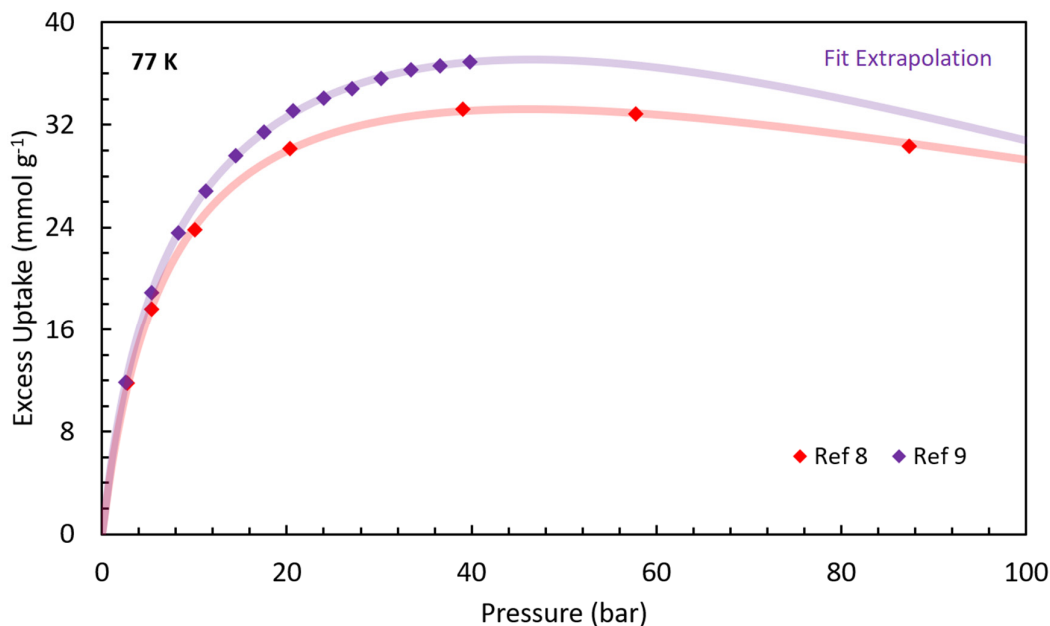

**Figure S3.** Excess H<sub>2</sub> adsorption uptake on MOF-177 powder at 77 K.<sup>8,9</sup>

Two references for H<sub>2</sub> adsorption on MOF-177 powder at 298 K are compared in **Figure S4**. Both measurements are consistent. The excess uptake reported by Zacharia and coworkers<sup>8</sup> was ultimately chosen for further analysis in this work.

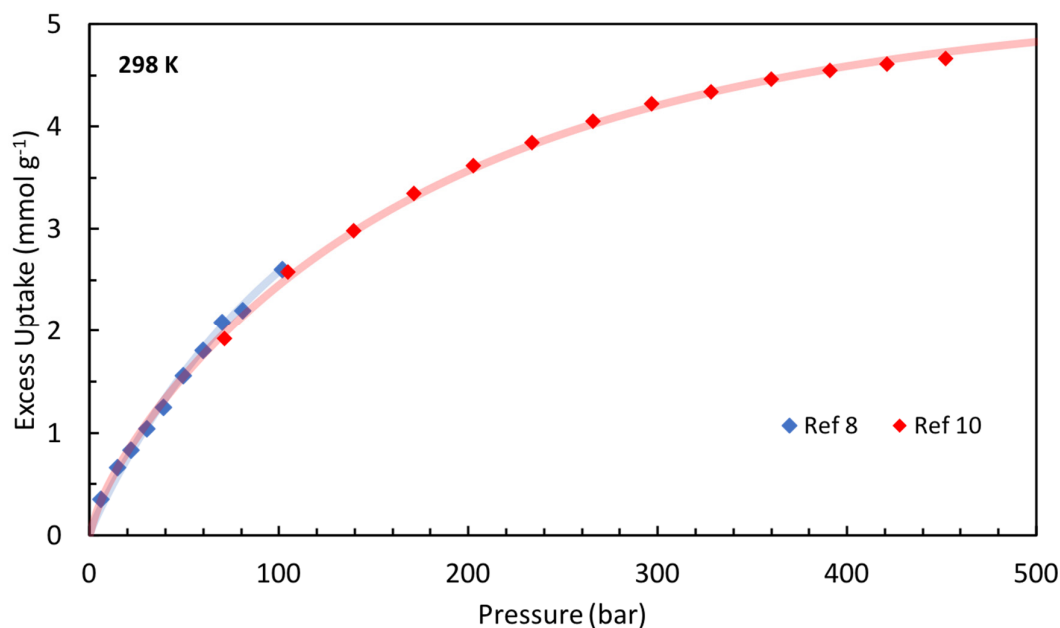

**Figure S4.** Excess H<sub>2</sub> adsorption uptake on MOF-177 powder at 298 K.<sup>8,10</sup>

### 2.3. IRMOF-20 Powder

One reference for H<sub>2</sub> adsorption on IRMOF-20 powder at 77 K was reviewed,<sup>11</sup> as shown in **Figure S5**.

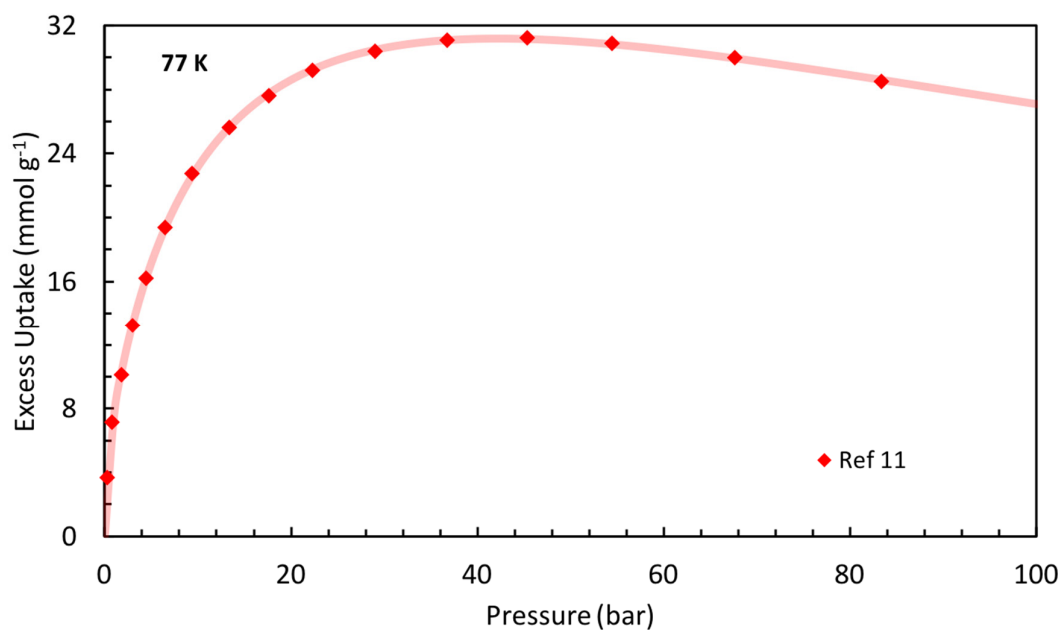

**Figure S5.** Excess H<sub>2</sub> adsorption uptake on IRMOF-20 powder at 77 K.<sup>11</sup>

Two references for H<sub>2</sub> adsorption on IRMOF-20 powder at 298 K are compared in **Figure S6**. The excess uptake reported by Purewal and coworkers<sup>11</sup> was ultimately chosen for further analysis in this work.

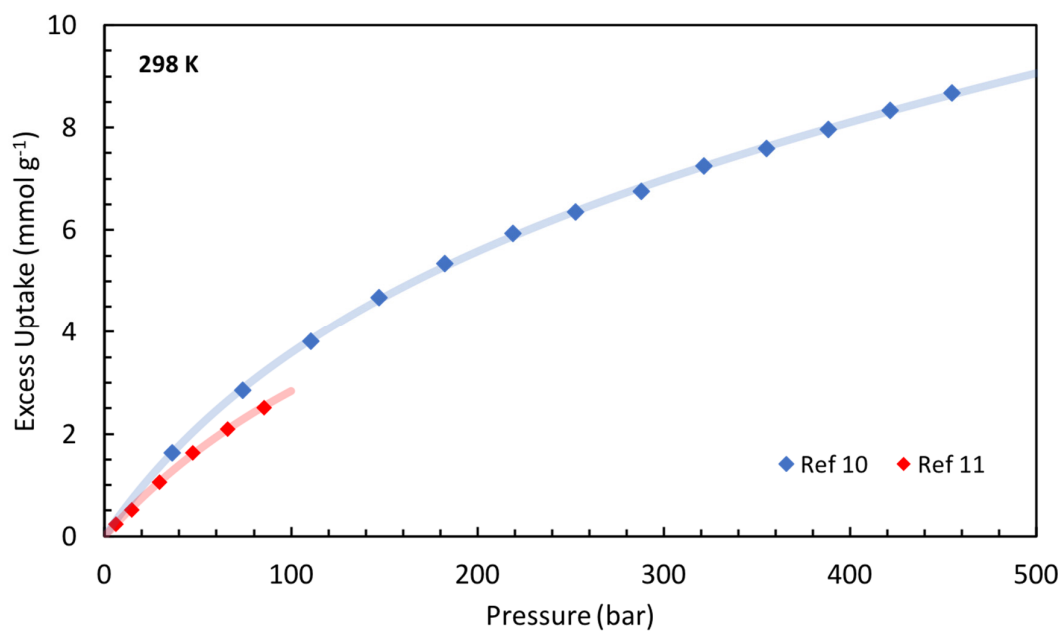

**Figure S6.** Excess H<sub>2</sub> adsorption uptake on IRMOF-20 powder at 298 K.<sup>10, 11</sup>

#### 2.4. SNU-70 Powder

One reference for H<sub>2</sub> adsorption on SNU-70 powder at 77 K was reviewed,<sup>11</sup> as shown in **Figure S7**.

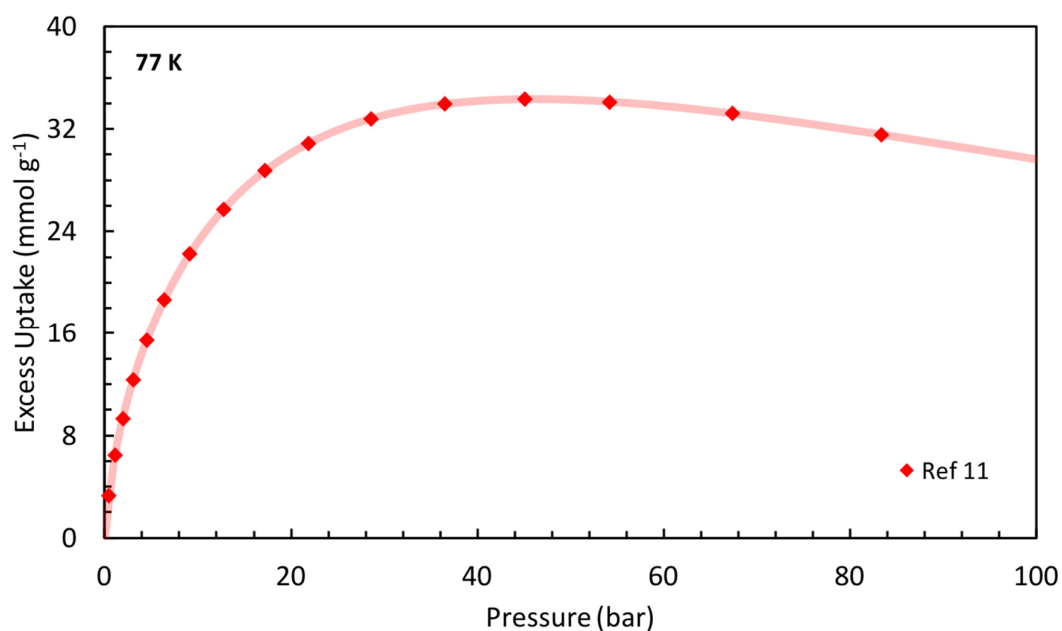

**Figure S7.** Excess H<sub>2</sub> adsorption uptake on SNU-70 powder at 77 K.<sup>11</sup>

#### 2.5. Ni<sub>2</sub>(m-dobdc) Powder

One reference for H<sub>2</sub> adsorption on Ni<sub>2</sub>(m-dobdc) powder at 298 K was reviewed,<sup>12</sup> as shown in **Figure S8**.

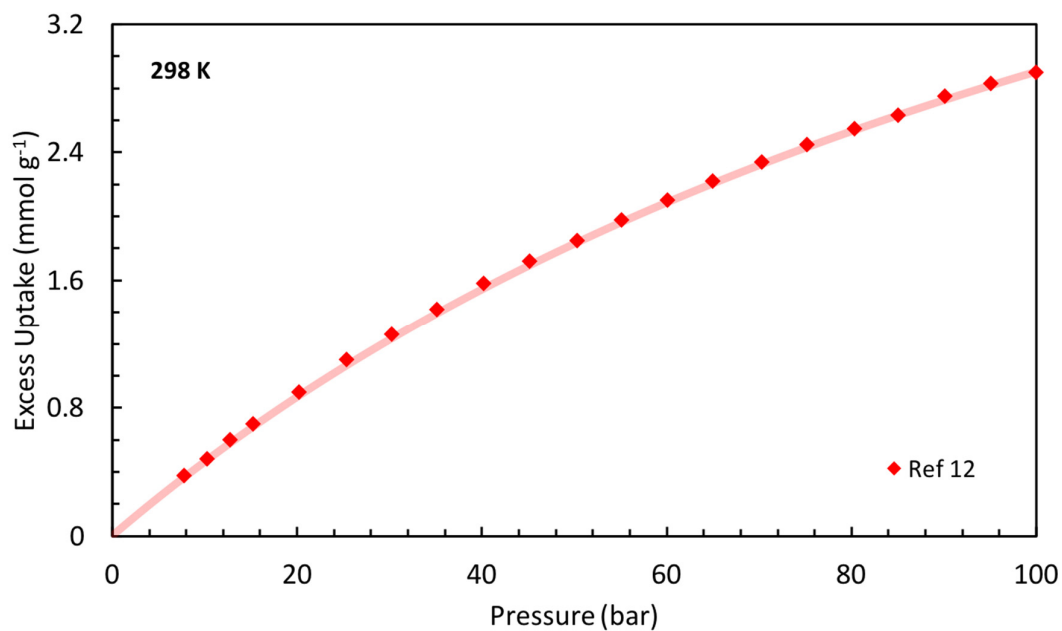

**Figure S8.** Excess H<sub>2</sub> adsorption uptake on Ni<sub>2</sub>(m-dobdc) powder at 298 K.<sup>12</sup>

### 2.6. UiO-66 Powder

One reference for H<sub>2</sub> adsorption on UiO-66 powder at 77 K was reviewed,<sup>13</sup> as shown in **Figure S9**.

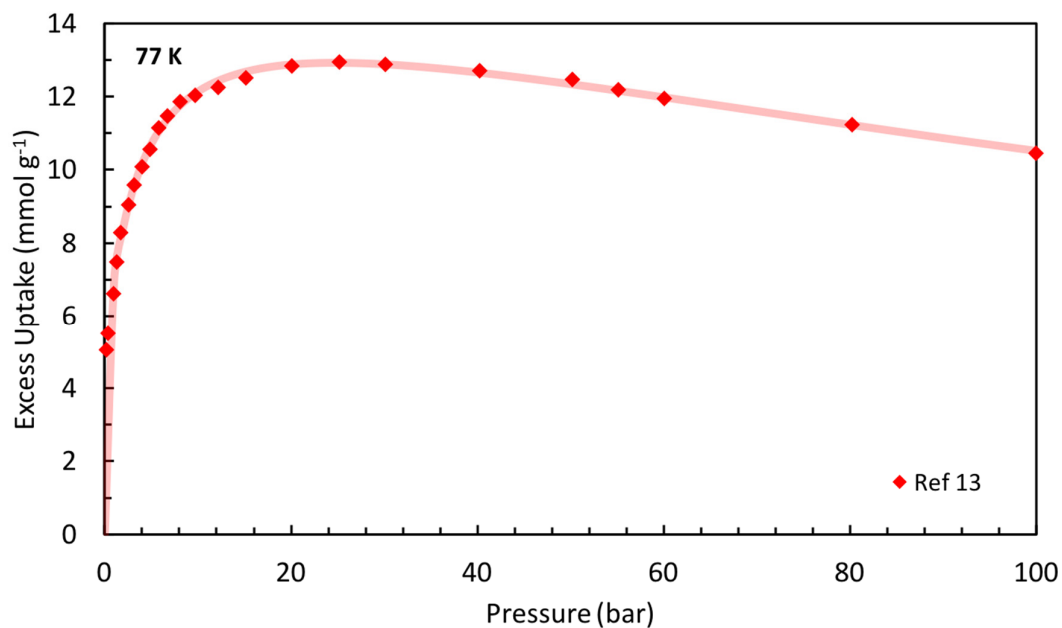

**Figure S9.** Excess H<sub>2</sub> adsorption uptake on UiO-66 powder at 77 K.<sup>13</sup>

One reference for H<sub>2</sub> adsorption on UiO-66 powder at 298 K was reviewed,<sup>13</sup> as shown in **Figure S10**.

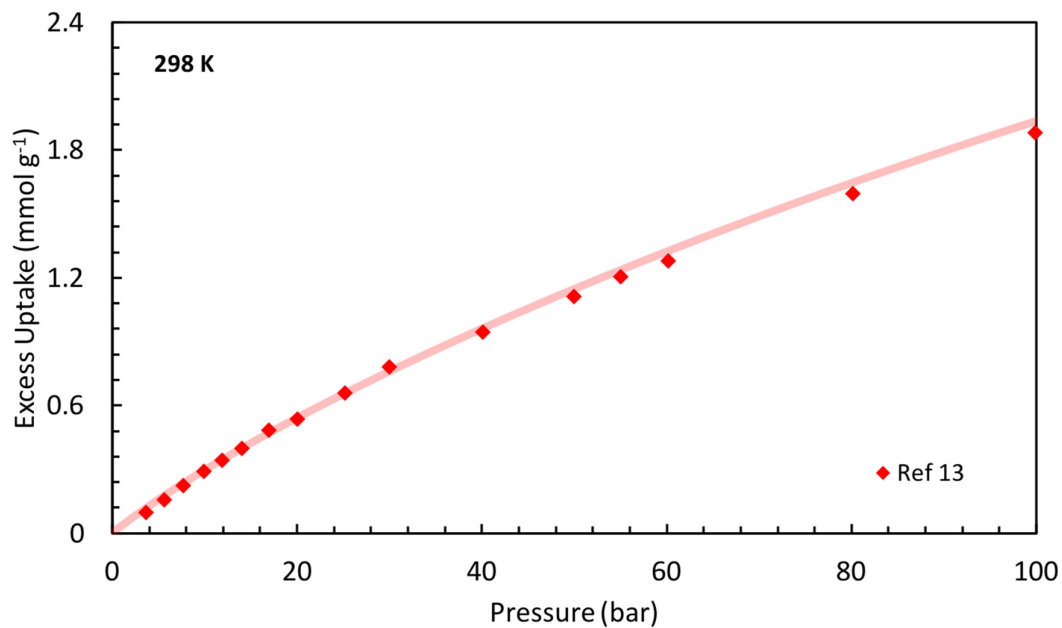

**Figure S10.** Excess H<sub>2</sub> adsorption uptake on UiO-66 powder at 298 K.<sup>13</sup>

### 2.7. HKUST-1 Powder

Three references for H<sub>2</sub> adsorption on HKUST-1 powder at 77 K are compared in **Figure S11**. The excess uptake reported by García-Holley and coworkers<sup>14</sup> was ultimately chosen for further analysis in this work.

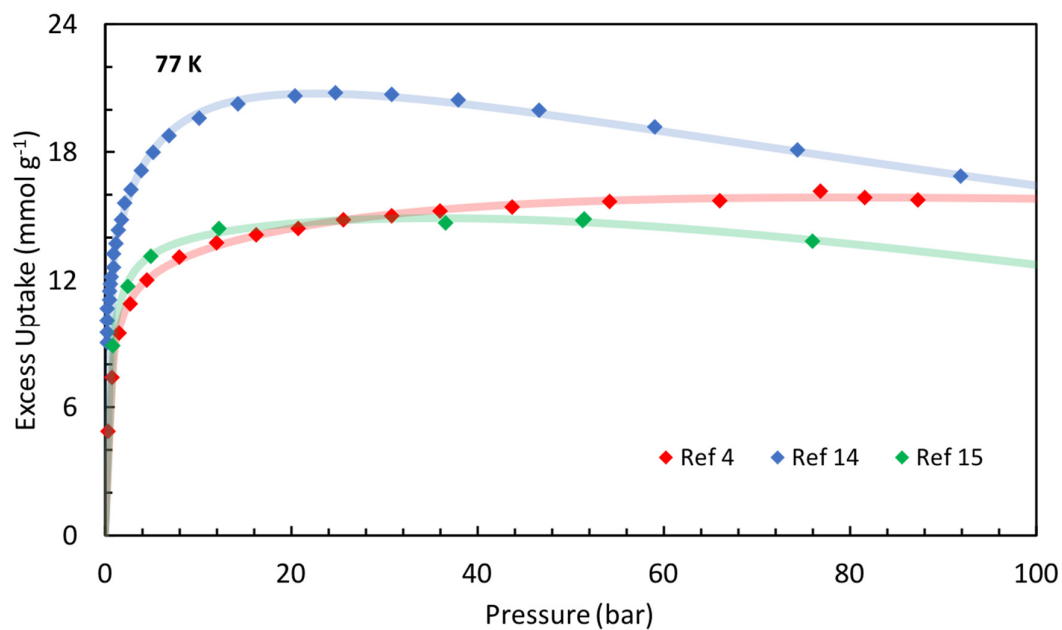

**Figure S11.** Excess H<sub>2</sub> adsorption uptake on HKUST-1 powder at 77 K.<sup>4,14,15</sup>

One references for H<sub>2</sub> adsorption on HKUST-1 powder at 298 K was reviewed,<sup>14</sup> as shown in **Figure S12**.

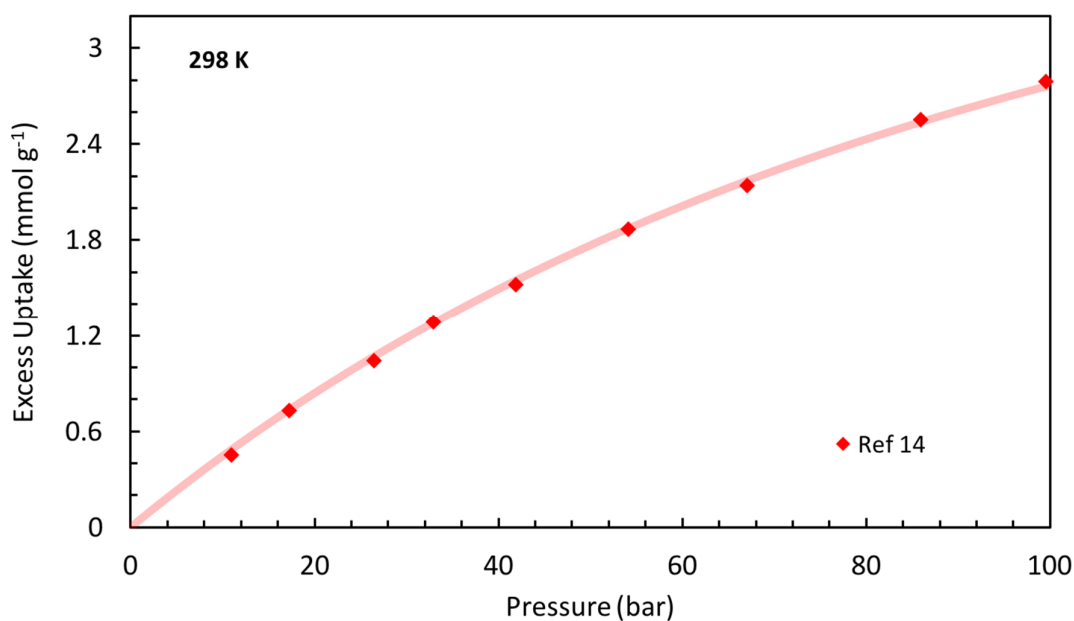

**Figure S12.** Excess H<sub>2</sub> adsorption uptake on HKUST-1 powder at 298 K.<sup>14</sup>

### 2.8. Zeolite-Templated Carbon (ZTC) Powder

Two references for H<sub>2</sub> adsorption on faujasite-type ZTC (FAU-ZTC) powder at 77 K are compared in **Figure S13**. The excess uptake reported by Geng and coworkers<sup>16</sup> was ultimately chosen for further analysis in this work.

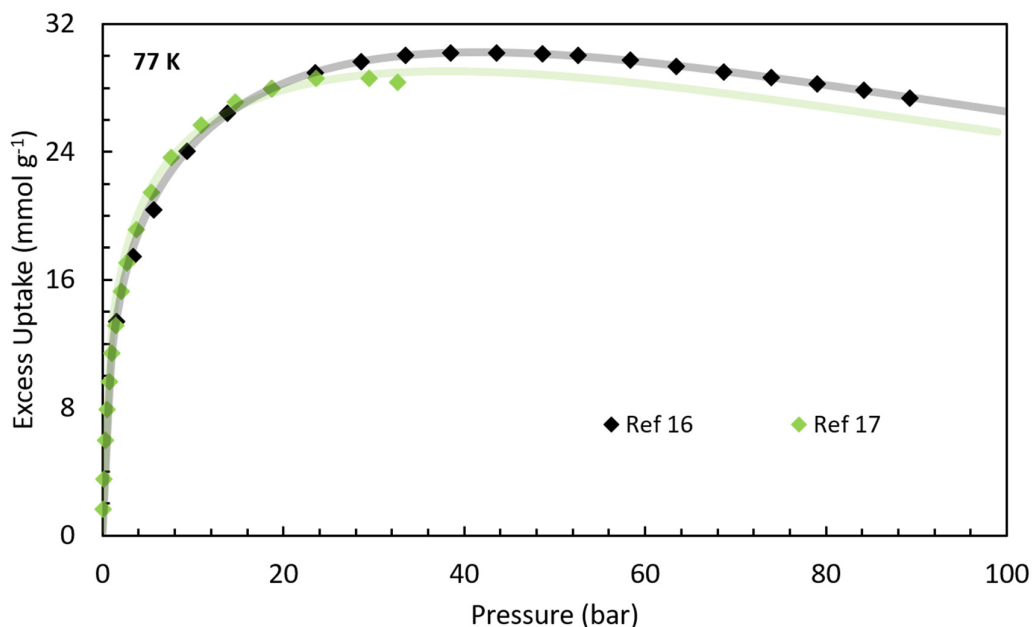

**Figure S13.** Excess H<sub>2</sub> adsorption uptake on FAU-ZTC powder at 77 K.<sup>16,17</sup>

Four references for H<sub>2</sub> adsorption on faujasite-type ZTC (FAU-ZTC) powder at 298 K are compared in **Figure S14**. The excess uptake reported by Gabe and coworkers<sup>18</sup> was ultimately chosen for further analysis in this work.

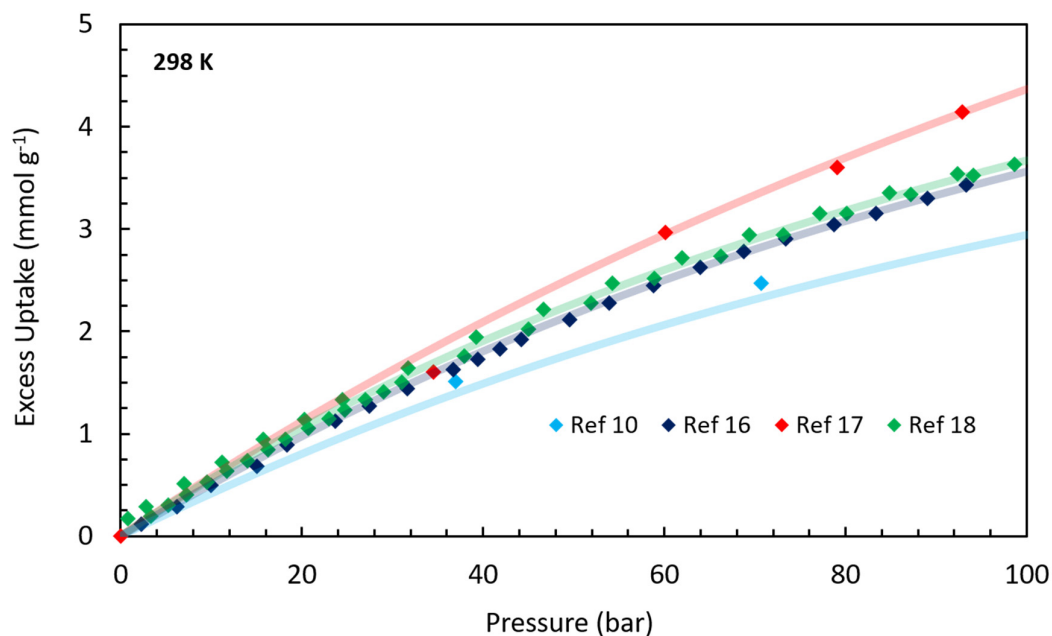

**Figure S14.** Excess H<sub>2</sub> adsorption uptake on FAU-ZTC powder at 298 K.<sup>10,16-18</sup>

### 2.9. Zeolite 13X Powder

One reference for H<sub>2</sub> adsorption on Zeolite 13X powder at 77 K was reviewed,<sup>19</sup> as shown in **Figure S15**.

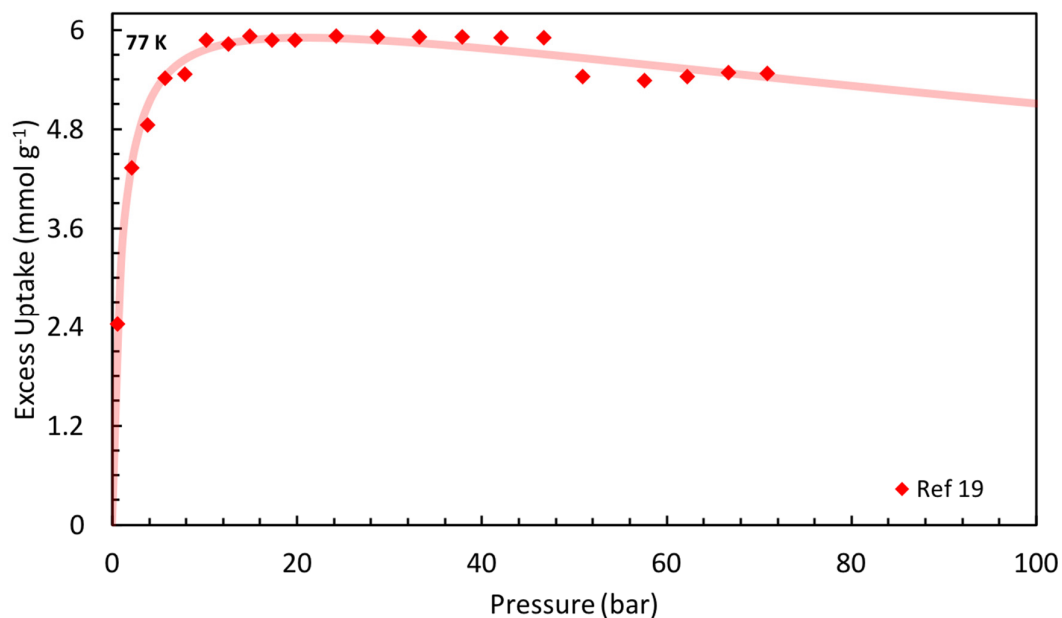

**Figure S15.** Excess H<sub>2</sub> adsorption uptake on Zeolite 13X powder at 77 K.<sup>19</sup>

One reference for H<sub>2</sub> adsorption on Zeolite 13X powder at 298 K was reviewed, as shown in **Figure S16**.

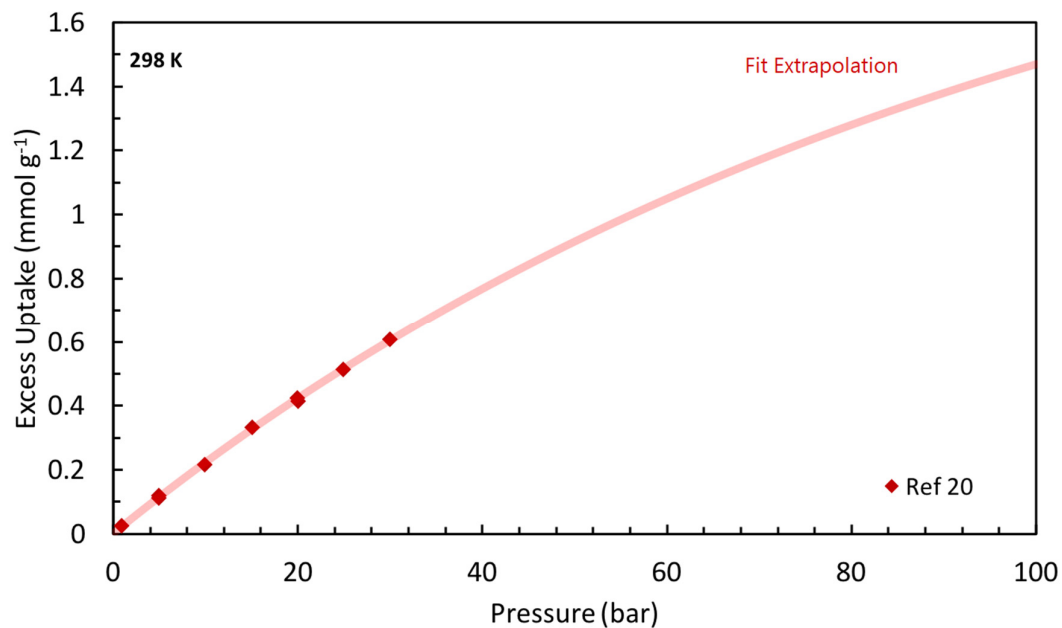

**Figure S16.** Excess H<sub>2</sub> adsorption uptake on Zeolite 13X powder at 298 K.<sup>20</sup>

### 2.10. MOF-5 Pellets

One reference for H<sub>2</sub> adsorption on neat MOF-5 pellets at 77 K was reviewed,<sup>7</sup> as shown in **Figure S17**.

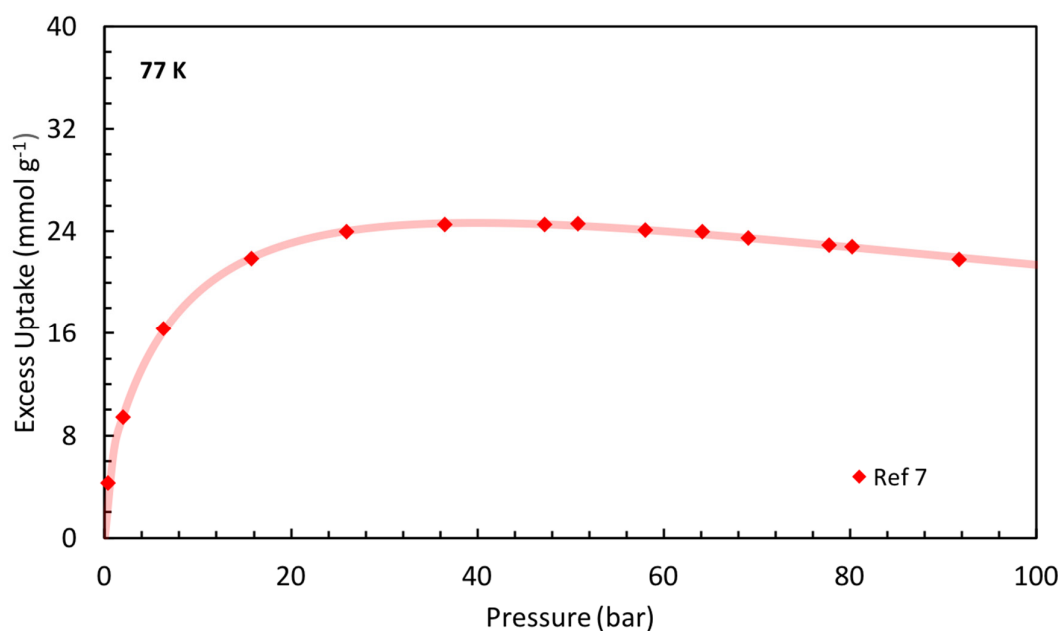

**Figure S17.** Excess H<sub>2</sub> adsorption uptake on neat MOF-5 pellets at 77 K.<sup>7</sup>

One reference for H<sub>2</sub> adsorption on MOF-5/ENG pellets at 77 K was reviewed,<sup>7</sup> as shown in **Figure S18**.

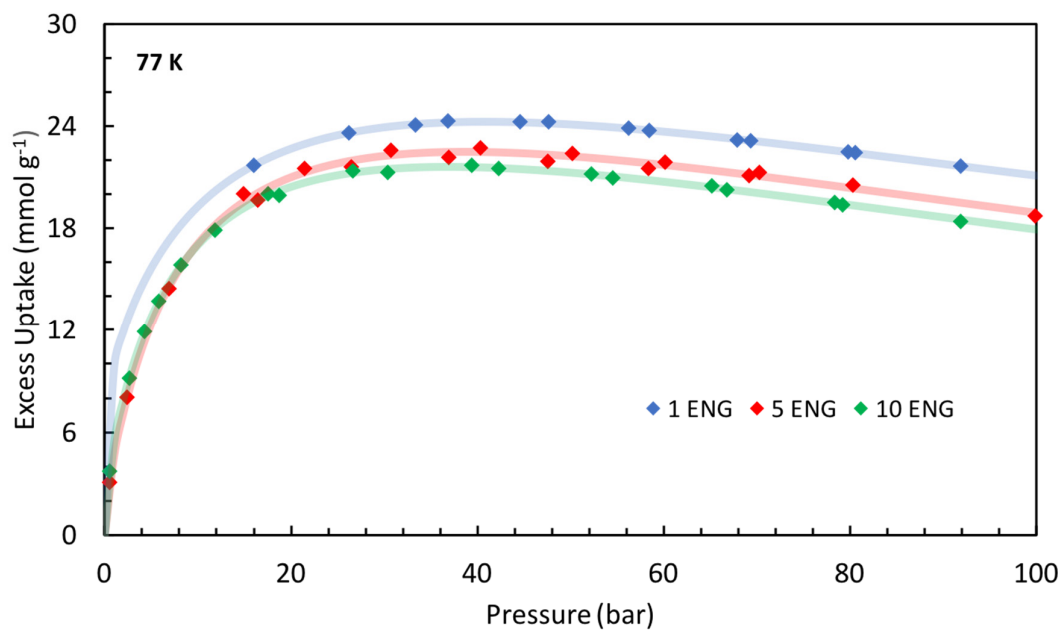

**Figure S18.** Excess H<sub>2</sub> adsorption uptake on MOF-5/ENG pellets at 77 K.<sup>7</sup>

### 2.11. MOF-177 Pellets

One reference for H<sub>2</sub> adsorption on neat MOF-177 pellets at 77 K was reviewed,<sup>8</sup> as shown in **Figure S19**.

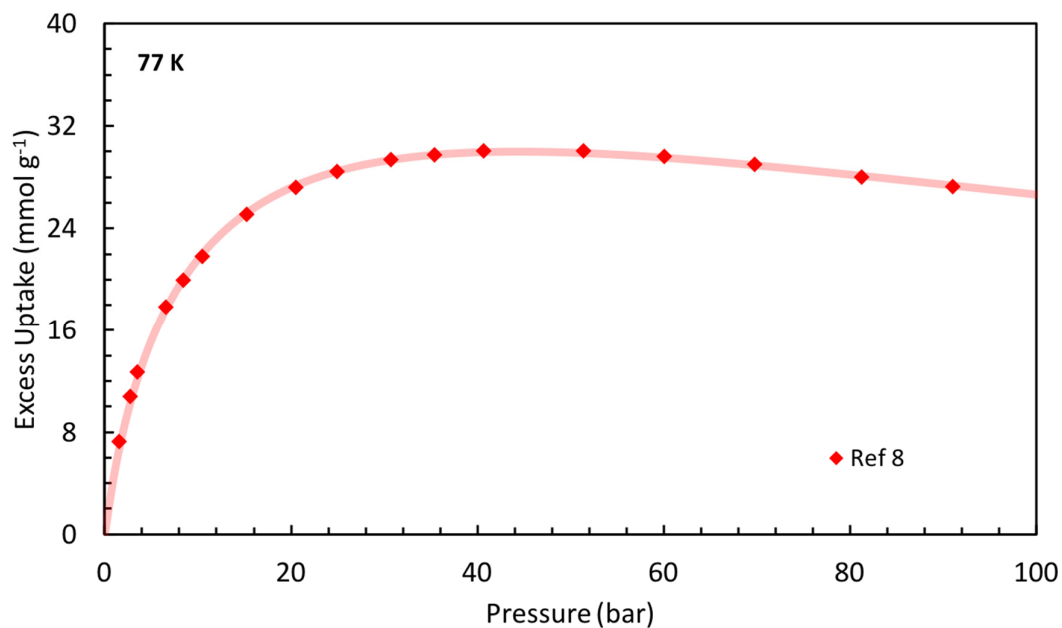

**Figure S19.** Excess H<sub>2</sub> adsorption uptake on neat MOF-177 pellets at 77 K.<sup>8</sup>

### 2.12. SNU-70 Pellets

One reference for H<sub>2</sub> adsorption on neat SNU-70 pellets at 77 K was reviewed,<sup>11</sup> as shown in **Figure S20**.

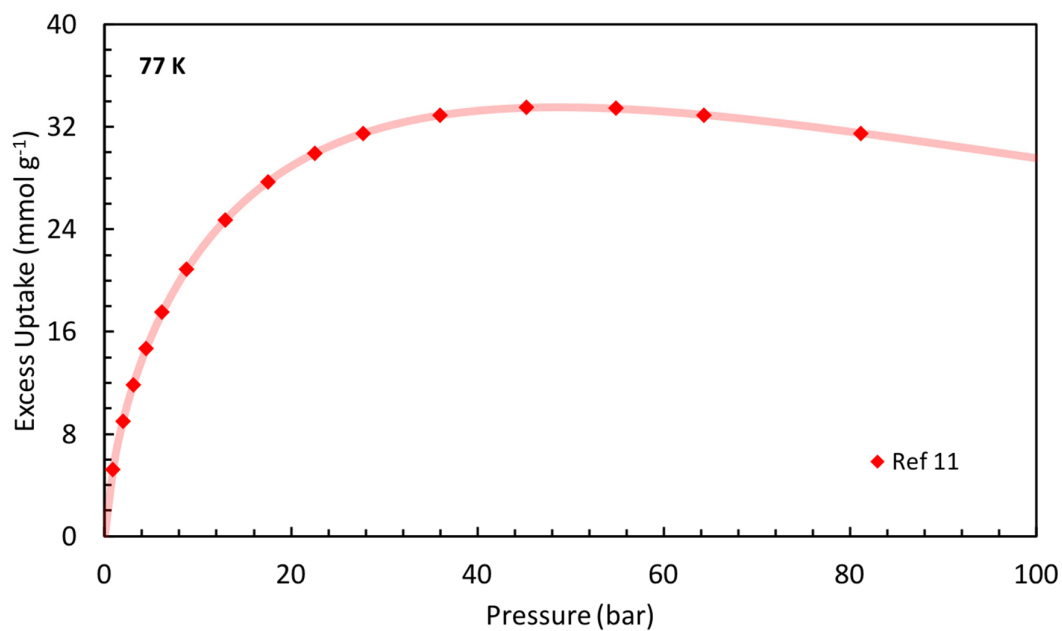

**Figure S20.** Excess H<sub>2</sub> adsorption uptake on neat SNU-70 pellets at 77 K.<sup>11</sup>

### 2.13. UiO-66 Pellets

One reference for H<sub>2</sub> adsorption on a neat UiO-66 pellet at 77 K was reviewed,<sup>13</sup> as shown in **Figure S21**.

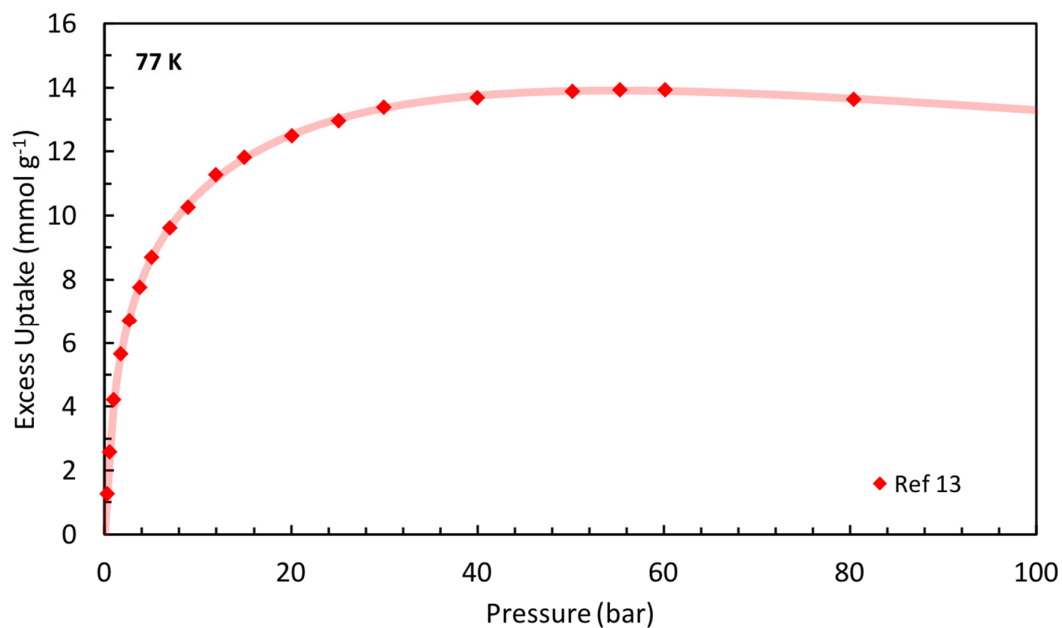

**Figure S21.** Excess H<sub>2</sub> adsorption uptake on a neat UiO-66 pellet at 77 K.<sup>13</sup>

One reference for H<sub>2</sub> adsorption on a neat UiO-66 pellet at 298 K was reviewed,<sup>13</sup> as shown in **Figure S22**.

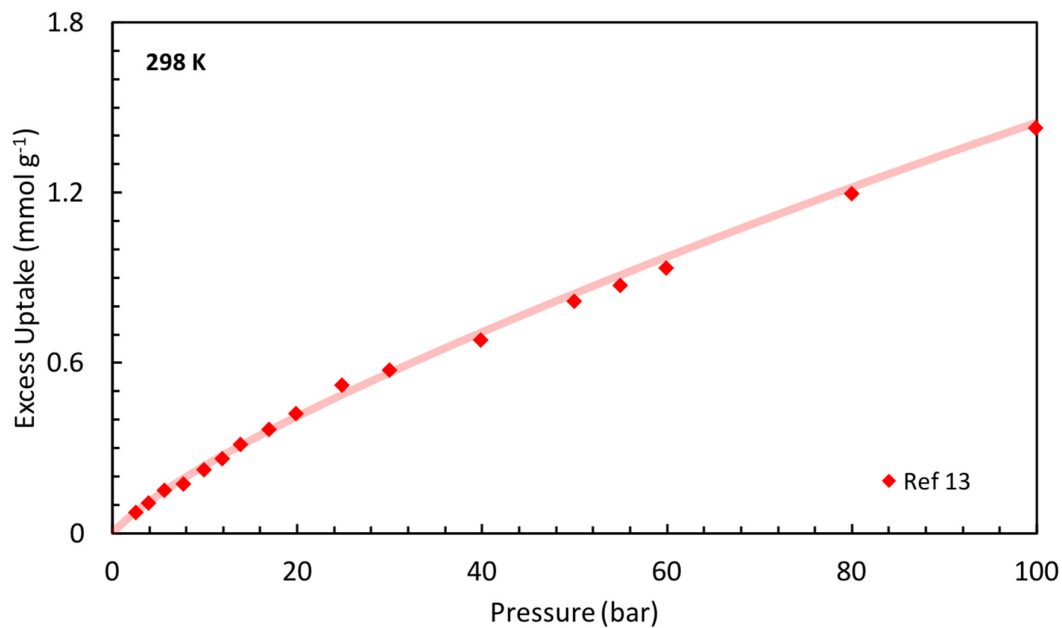

**Figure S22.** Excess H<sub>2</sub> adsorption uptake on a neat UiO-66 pellet at 298 K.<sup>13</sup>

#### 2.14. HKUST-1 Pellets

One reference for H<sub>2</sub> adsorption on neat HKUST-1 pellets at 77 K was reviewed,<sup>15</sup> as shown in **Figure S23**.

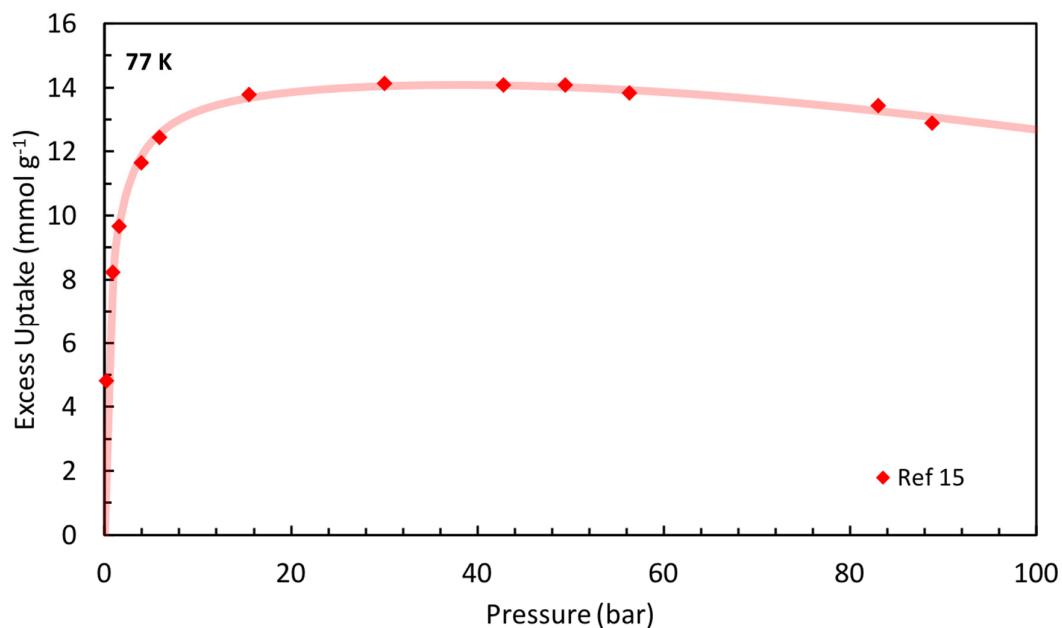

**Figure S23.** Excess H<sub>2</sub> adsorption uptake on neat HKUST-1 pellets at 77 K.<sup>15</sup>

One reference for H<sub>2</sub> adsorption on neat HKUST-1 pellets at 295 K was reviewed,<sup>15</sup> as shown in **Figure S24**.

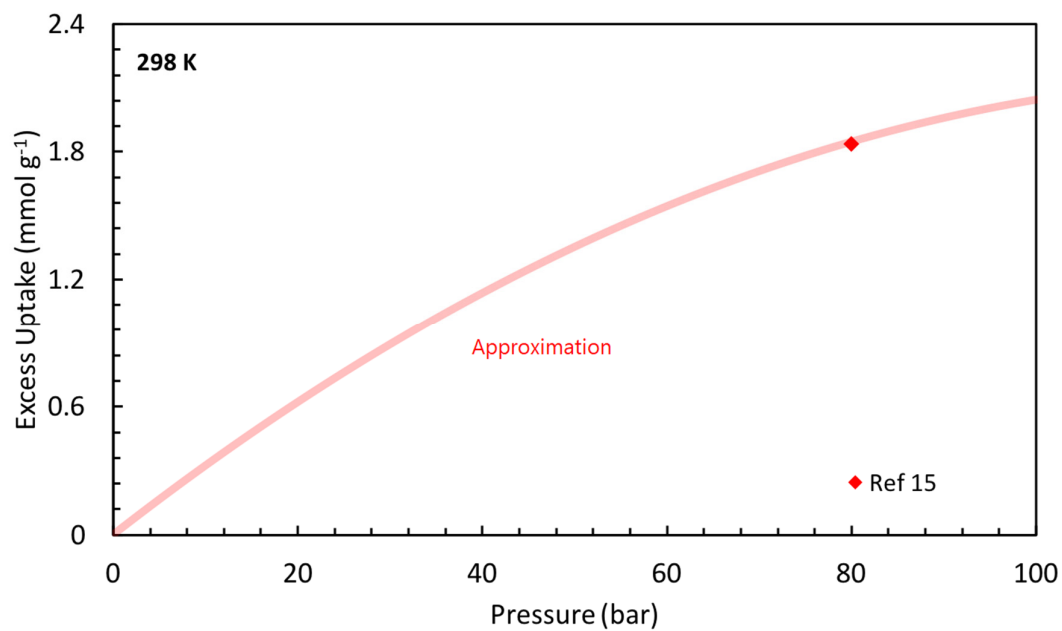

**Figure S24.** Excess H<sub>2</sub> adsorption uptake on neat HKUST-1 pellets at 295 K (~298 K).<sup>15</sup>

### 2.15. Zeolite-Templated Carbon (ZTC) Pellets

H<sub>2</sub> adsorption on a ZTC/rGO pellet (based on FAU-ZTC) at 77 K is shown in **Figure S25**. The pellet properties are reported elsewhere.<sup>18</sup>

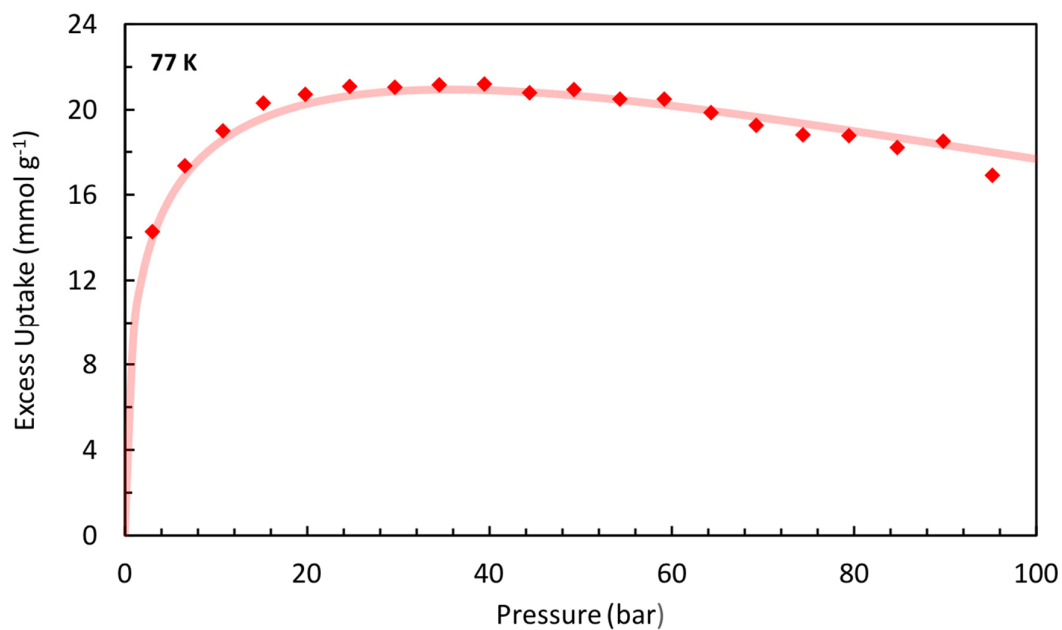

**Figure S25.** Excess H<sub>2</sub> adsorption uptake on a ZTC/rGO pellet at 77 K.

One reference for H<sub>2</sub> adsorption on a ZTC/rGO pellet (based on FAU-ZTC) at 298 K was reviewed,<sup>18</sup> as shown in **Figure S26**.

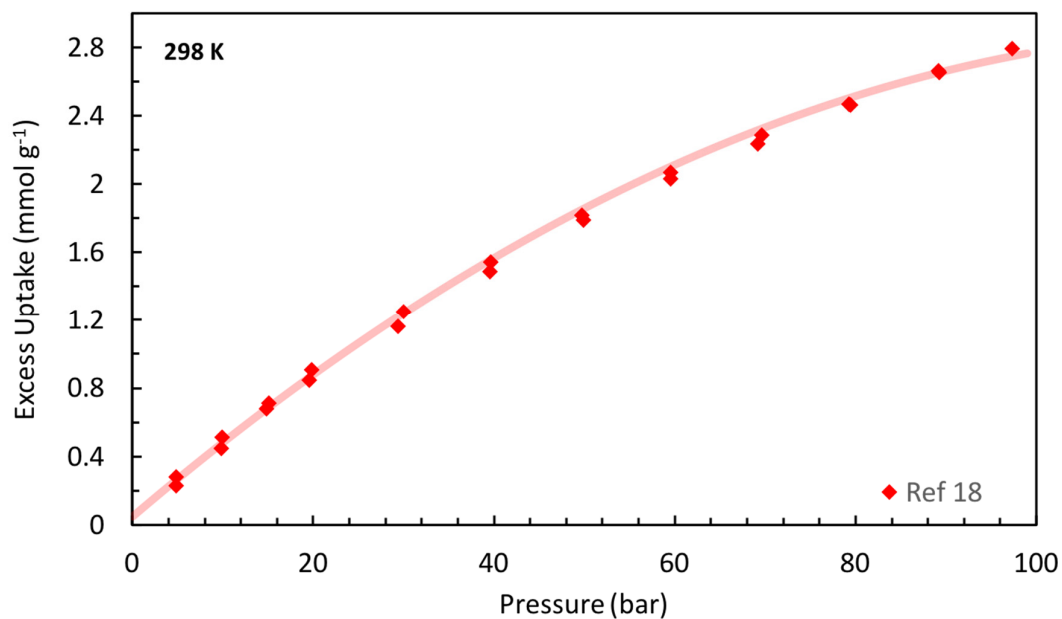

**Figure S26.** Excess H<sub>2</sub> adsorption uptake on a ZTC/rGO pellet at 298 K.<sup>18</sup>

### S3. Crystal Properties

The ideal structural properties of the benchmark MOFs were evaluated using crystallographic data archived within the Cambridge Crystallographic Data Centre (CCDC), Crystallography Open Database (COD)<sup>21</sup>, or International Zeolite Association (IZA)<sup>22</sup>. The “most accurate”<sup>23</sup> periodic model of ZTC containing a realistic distribution of O-bearing functional groups (referred to herein as Model II+) was obtained directly from Prof. Hirotomo Nishihara.<sup>24</sup> Each structure was stripped of all solvent and any site disorder, if applicable, prior to structural analysis using the Zeo++ software package (version 0.3).<sup>25</sup> Bulk density was determined directly from the periodic (solvent-free) unit cell. Specific surface area and total pore volume were determined based on the fraction of the unit cell accessible to a spherical probe of radius 0.120 nm, using 2,000 and 200 Monte Carlo samples per cell, respectively. A spherical probe diameter of 0.240 nm mimics that of an H<sub>2</sub> molecule at 77 K,<sup>26</sup> leading to specific surface areas and pore volumes that are ultimately relevant to H<sub>2</sub> adsorption on pristine crystals. For comparison to the measured N<sub>2</sub>-accessible surface area, additional calculations were also performed using a spherical probe of radius 0.186 nm, using 2,000 and 200 Monte Carlo samples per cell, otherwise identical to those for the smaller probe. The results are reported in **Tables S1** and **S2**.

**Table S1.** Crystal Properties of Benchmark MOFs, Zeolites, and ZTC, Accessible to an H<sub>2</sub> Probe (2.40 Å in diameter)

| Material                           | Bulk Density<br>(g mL <sup>-1</sup> ) | Skeletal Density<br>(g mL <sup>-1</sup> ) | Pore Volume<br>(mL g <sup>-1</sup> ) | BET SA<br>(m <sup>2</sup> g <sup>-1</sup> ) | BET SA<br>(m <sup>2</sup> mL <sup>-1</sup> ) | X <sub>void</sub><br>(%) | CIF Reference         |
|------------------------------------|---------------------------------------|-------------------------------------------|--------------------------------------|---------------------------------------------|----------------------------------------------|--------------------------|-----------------------|
| MOF-5**                            | 0.5992                                | 2.7334                                    | 1.3030                               | 3733                                        | 2237                                         | 78.08%                   | average**             |
| MOF-177                            | 0.4256                                | 2.1461                                    | 1.8836                               | 4541                                        | 1933                                         | 80.17%                   | 230642 (CCDC)         |
| IRMOF-20                           | 0.5110                                | 1.8405                                    | 1.4135                               | 3559                                        | 1819                                         | 72.24%                   | 4101152 (COD)         |
| SNU-70                             | 0.4005                                | 2.4081                                    | 2.0816                               | 4862                                        | 1947                                         | 83.37%                   | 846935 (CCDC)         |
| UiO-66                             | 1.2348                                | 2.6286                                    | 0.4294                               | 2135                                        | 2636                                         | 53.02%                   | 733458 (CCDC)         |
| HKUST-1                            | 0.8791                                | 2.8222                                    | 0.7832                               | 2718                                        | 2402                                         | 68.16%                   | 112954 (CCDC)         |
| Ni <sub>2</sub> ( <i>m</i> -dobdc) | 1.2510                                | 3.0437                                    | 0.4708                               | 1488                                        | 1861                                         | 58.90%                   | authors <sup>12</sup> |
| <b>*BEA</b>                        | 1.5284                                | 2.629                                     | 0.2739                               | 1157                                        | 1768                                         | 41.86%                   | <b>*BEA</b> (IZA)     |
| <b>EMT</b>                         | 1.3291                                | 2.423                                     | 0.3397                               | 1149                                        | 1527                                         | 45.15%                   | <b>EMT</b> (IZA)      |
| <b>FAU</b>                         | 1.3278                                | 2.435                                     | 0.3425                               | 1160                                        | 1541                                         | 45.48%                   | <b>FAU</b> (IZA)      |
| <b>LTA</b>                         | 1.4143                                | 2.395                                     | 0.2986                               | 1144                                        | 1618                                         | 40.96%                   | <b>LTA</b> (IZA)      |
| <b>MFI</b>                         | 1.8382                                | 2.575                                     | 0.1557                               | 763                                         | 1402                                         | 28.62%                   | <b>MFI</b> (IZA)      |
| <b>FAU-ZTC</b>                     | 0.4626                                | 1.9146                                    | 1.6394                               | 4374                                        | 2023                                         | 75.84%                   | authors <sup>24</sup> |

\*\*MOF-5 is reported herein as the average of two experimental CIFs: 256965 (CCDC) and 1516287 (COD)

**Table S2.** Crystal Properties of Benchmark MOFs, Zeolites, and ZTC, Accessible to an N<sub>2</sub> Probe (3.72 Å in diameter)

| Material                           | Bulk Density<br>(g mL <sup>-1</sup> ) | Skeletal Density<br>(g mL <sup>-1</sup> ) | Pore Volume<br>(mL g <sup>-1</sup> ) | BET SA<br>(m <sup>2</sup> g <sup>-1</sup> ) | BET SA<br>(m <sup>2</sup> mL <sup>-1</sup> ) | X <sub>void</sub><br>(%) | CIF Reference         |
|------------------------------------|---------------------------------------|-------------------------------------------|--------------------------------------|---------------------------------------------|----------------------------------------------|--------------------------|-----------------------|
| MOF-5**                            | 0.5992                                | 2.549                                     | 1.2765                               | 3633                                        | 2177                                         | 76.49%                   | average**             |
| MOF-177                            | 0.4256                                | 2.055                                     | 1.8629                               | 4590                                        | 1954                                         | 79.29%                   | 230642 (CCDC)         |
| IRMOF-20                           | 0.5110                                | 1.750                                     | 1.3855                               | 3495                                        | 1786                                         | 70.81%                   | 4101152 (COD)         |
| SNU-70                             | 0.4005                                | 2.192                                     | 2.0407                               | 4784                                        | 1916                                         | 81.73%                   | 846935 (CCDC)         |
| UiO-66                             | 1.2348                                | 2.283                                     | 0.3719                               | 1047                                        | 1292                                         | 45.92%                   | 733458 (CCDC)         |
| HKUST-1                            | 0.8837                                | 2.407                                     | 0.7161                               | 2026                                        | 1790                                         | 63.28%                   | 112954 (CCDC)         |
| Ni <sub>2</sub> ( <i>m</i> -dobdc) | 1.2510                                | 2.906                                     | 0.4553                               | 1194                                        | 1494                                         | 56.96%                   | authors <sup>12</sup> |
| <b>*BEA</b>                        | 1.5284                                | 2.576                                     | 0.2661                               | 874                                         | 1335                                         | 40.67%                   | <b>*BEA</b> (IZA)     |
| <b>EMT</b>                         | 1.3291                                | 2.399                                     | 0.3356                               | 961                                         | 1277                                         | 44.60%                   | <b>EMT</b> (IZA)      |
| <b>FAU</b>                         | 1.3278                                | 2.410                                     | 0.3382                               | 972                                         | 1290                                         | 44.91%                   | <b>FAU</b> (IZA)      |
| <b>LTA</b>                         | 1.4143                                | 2.348                                     | 0.2811                               | 741                                         | 1048                                         | 39.76%                   | <b>LTA</b> (IZA)      |
| <b>MFI</b>                         | 1.8382                                | 2.454                                     | 0.1365                               | 364                                         | 670                                          | 25.09%                   | <b>MFI</b> (IZA)      |
| FAU-ZTC                            | 0.4626                                | 1.815                                     | 1.611                                | 4295                                        | 1987                                         | 74.51%                   | authors <sup>24</sup> |

\*\*MOF-5 is reported herein as the average of two experimental CIFs: 256965 (CCDC) and 1516287 (COD)

The crystal properties of the five single-layer graphene (SLG) slit pore models investigated by Bénard and coworkers<sup>1</sup> are shown in **Table S3**. The unit cells were constructed by extending the lattice parameter, *c*, of graphite. Identical methods were used to determine the pore volume and surface area as for the MOFs, zeolites, and ZTC in **Tables S1–S2**.

**Table S3.** Crystal Properties of SLG Slit Pore Models, Accessible to an H<sub>2</sub> Probe (2.40 Å in diameter)

| Model  | Slit Spacing<br>(Å) | Bulk Density<br>(g mL <sup>-1</sup> ) | Skeletal Density<br>(g mL <sup>-1</sup> ) | Pore Volume<br>(mL g <sup>-1</sup> ) | BET SA<br>(m <sup>2</sup> g <sup>-1</sup> ) | BET SA<br>(m <sup>2</sup> mL <sup>-1</sup> ) | X <sub>void</sub><br>(%) | Reference |
|--------|---------------------|---------------------------------------|-------------------------------------------|--------------------------------------|---------------------------------------------|----------------------------------------------|--------------------------|-----------|
| SLG9Å  | 9                   | 0.8484                                | 2.2033                                    | 0.7248                               | 2961                                        | 2512                                         | 61.49%                   | this work |
| SLG12Å | 12                  | 0.6363                                | 2.2031                                    | 1.1177                               | 2961                                        | 1884                                         | 71.12%                   | this work |
| SLG15Å | 15                  | 0.5090                                | 2.1771                                    | 1.5052                               | 2961                                        | 1507                                         | 76.62%                   | this work |
| SLG18Å | 18                  | 0.4242                                | 2.2028                                    | 1.9035                               | 2961                                        | 1256                                         | 80.74%                   | this work |
| SLG20Å | 20                  | 0.3818                                | 2.2448                                    | 2.1739                               | 2961                                        | 1130                                         | 82.99%                   | this work |

#### S4. Powder and Pellet Properties

Powder and pellet properties from several benchmark MOFs, carbons, and zeolites were retrieved and analyzed as part of this review, as summarized in **Tables S4** and **S5**. Note: surface areas and pore volumes are shown “as reported” with no attempt made to regularize their analysis.

**Table S4.** Powder and Densified Powder Properties of Benchmark MOFs and ZTC

| Material    | Method | Bulk Density<br>(g mL <sup>-1</sup> ) | Skeletal Density<br>(g mL <sup>-1</sup> ) | Pore Volume<br>(mL g <sup>-1</sup> ) | BET SA<br>(m <sup>2</sup> g <sup>-1</sup> ) | BET SA<br>(m <sup>2</sup> mL <sup>-1</sup> ) | He X <sub>void</sub><br>(%) | Reference     |
|-------------|--------|---------------------------------------|-------------------------------------------|--------------------------------------|---------------------------------------------|----------------------------------------------|-----------------------------|---------------|
| MOF-5       | Tapped | 0.13                                  | 2.03                                      | 1.27                                 | 2763                                        | 359                                          | 94%                         | <sup>2</sup>  |
| MOF-5       | Jolted | 0.22                                  | 2.03                                      | 1.27                                 | 2763                                        | 608                                          | 89%                         | <sup>2</sup>  |
| MOF-177     | Tapped | 0.21                                  | 1.56                                      | 1.74                                 | 4143                                        | 858                                          | 87%                         | <sup>8</sup>  |
| MOF-177     | Tapped | 0.25                                  | 1.5                                       | 1.67                                 | 4126                                        | 1019                                         | 83%                         | <sup>10</sup> |
| IRMOF-20    | Tapped | 0.20                                  | 1.6                                       | 1.67                                 | 3689                                        | 738                                          | 88%                         | <sup>10</sup> |
| SNU-70      | Tapped | 0.20                                  | 1.95                                      | 2.03                                 | 4944                                        | 989                                          | 90%                         | <sup>11</sup> |
| UiO-66      | Tapped | 0.57                                  | 1.65                                      | 0.96                                 | 1737                                        | 990                                          | 65%                         | <sup>13</sup> |
| HKUST-1     | Tapped | 0.31                                  | 1.9                                       | 0.57                                 | 1290                                        | 396                                          | 84%                         | <sup>10</sup> |
| Zeolite 13X | Tapped | 0.595                                 | 2.36                                      | NR                                   | NR                                          | NR                                           | 75%                         | <sup>20</sup> |
| FAU-ZTC     | Tapped | 0.19                                  | 1.75                                      | 1.70                                 | 3792                                        | 720                                          | 89%                         | this work     |
| FAU-ZTC     | Tapped | 0.12                                  | 1.9                                       | 2.21                                 | 3035                                        | 358                                          | 94%                         | <sup>10</sup> |

NR – not reported

**Table S5.** Select Pellet Properties of Benchmark MOFs and ZTC

| Material | Binder  | Bulk Density<br>(g mL <sup>-1</sup> ) | Skeletal Density<br>(g mL <sup>-1</sup> ) | Pore Volume<br>(mL g <sup>-1</sup> ) | BET SA<br>(m <sup>2</sup> g <sup>-1</sup> ) | BET SA<br>(m <sup>2</sup> mL <sup>-1</sup> ) | X <sub>void</sub><br>(%) | Reference     |
|----------|---------|---------------------------------------|-------------------------------------------|--------------------------------------|---------------------------------------------|----------------------------------------------|--------------------------|---------------|
| MOF-5    | Neat    | 0.52                                  | 2.03                                      | 1.12                                 | 2263                                        | 1177                                         | 74%                      | <sup>7</sup>  |
| MOF-5    | 1% ENG  | 0.49                                  | 2.03                                      | 1.12                                 | 2584                                        | 1266                                         | 76%                      | <sup>7</sup>  |
| MOF-5    | 5% ENG  | 0.47                                  | 2.03                                      | 1.14                                 | 2623                                        | 1233                                         | 77%                      | <sup>7</sup>  |
| MOF-5    | 10% ENG | 0.48                                  | 2.03                                      | 1.06                                 | 2413                                        | 1156                                         | 76%                      | <sup>7</sup>  |
| MOF-177  | Neat    | 0.39                                  | 1.56                                      | 1.62                                 | 4029                                        | 1551                                         | 75%                      | <sup>8</sup>  |
| SNU-70   | Neat    | 0.24                                  | 1.95                                      | NR                                   | NR                                          | NR                                           | 88%                      | <sup>11</sup> |
| UiO-66   | Neat    | 1.45                                  | 1.78                                      | 0.81                                 | 1707                                        | 2475*                                        | 13%*                     | <sup>13</sup> |
| HKUST-1  | Neat    | 0.86                                  | NR                                        | 0.53                                 | 1189                                        | 1023                                         | NR                       | <sup>15</sup> |
| FAU-ZTC  | 5% rGO  | 0.67                                  | 1.69                                      | 1.35                                 | 2585                                        | 1732                                         | 60%                      | <sup>18</sup> |

NR – not reported

\*seemingly unphysical

### S5. Common vs. Skeletal vs. Swollen Approximations

The volumetric total quantity of  $H_2$  adsorbed, as generally defined by Equation 7, is subject to discrepancy on the basis of the source of information used to determine the bulk volume,  $V_{bulk}$ , and void fraction,  $X_{void}$ , of the adsorbent. Section 2.3 in the main text gives a description of three commonly employed pairs of information used to determine the volumetric storage quantity, given by Equations 8–10. An example of the discrepancy between these quantities is shown in **Figures 2b–2c**; the discrepancy is extremely large owing to the problematic assumption that the total pore volume of a powder (in this case, MOF-5) is equal to the total void volume of the powder when packed at tap density within a container. Hence, both the common and swollen approximations are inappropriate for powders.

However, the common approximation is very often employed in the analysis of monoliths and pellets. Two representative examples of the discrepancy that still exists between the three approximations when applied to pelletized samples of MOF-5<sup>7</sup> are shown in **Figures S27–S28**.

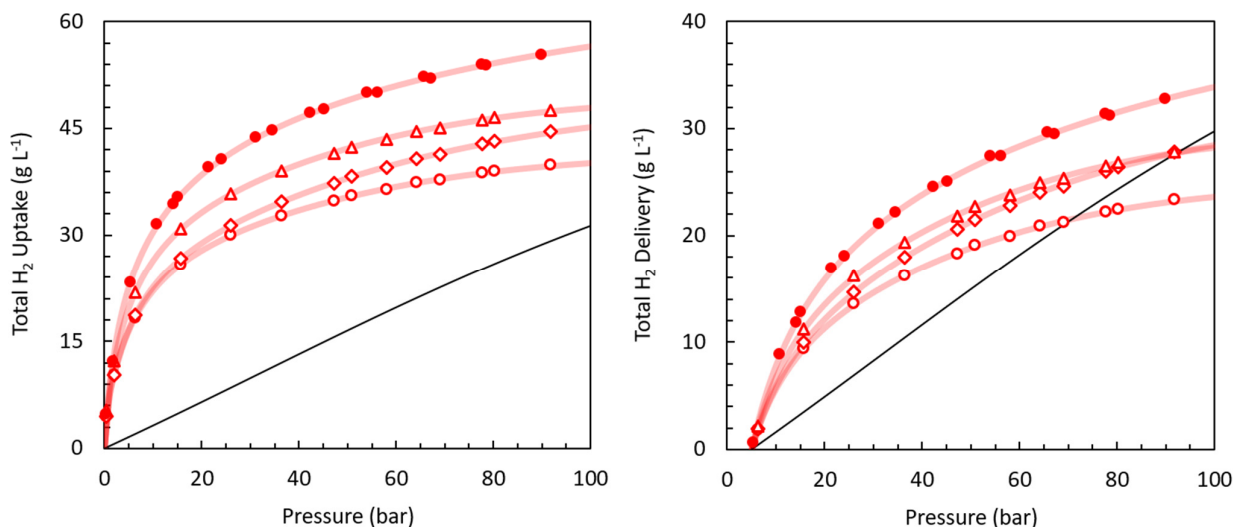

**Figure S27.** Total  $H_2$  uptake and delivery on a neat MOF-5 pellet at 77 K under three different assumptions: common (circle), skeletal (diamond), and swollen (triangle). The crystalline assumption for MOF-5 (filled circle) is shown for comparison.<sup>7</sup>

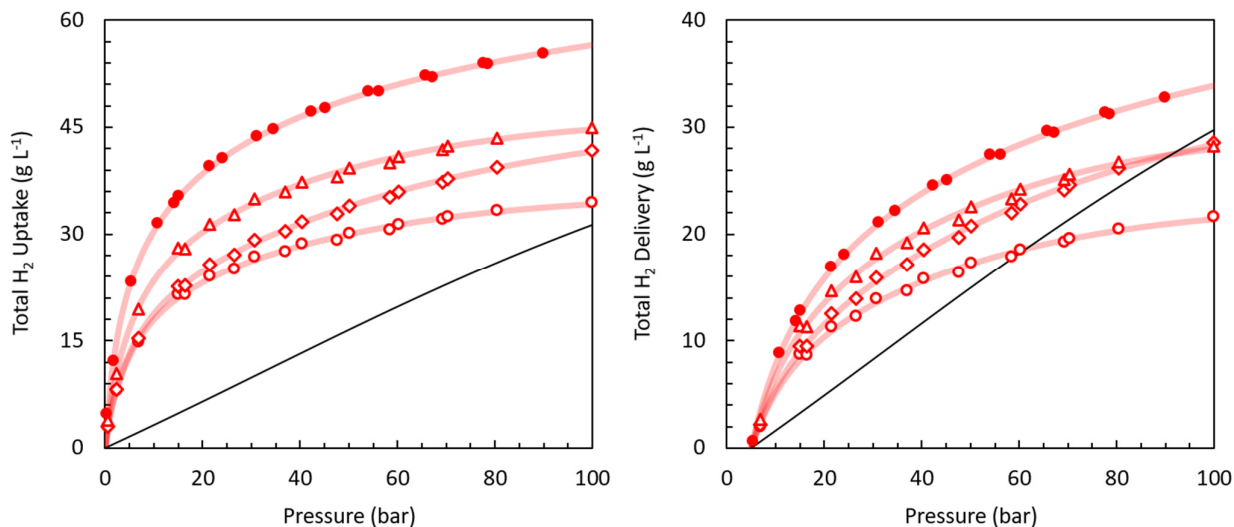

**Figure S28.** Total  $H_2$  uptake and delivery on a MOF-5/ENG pellet at 77 K under three different assumptions: common (circle), skeletal (diamond), and swollen (triangle). The crystalline assumption for MOF-5 (filled circle) is shown for comparison.<sup>7</sup>

### S6. Porous Carbon Comparison

The excess gravimetric H<sub>2</sub> uptake on selected porous carbon powders at 77 K and 298 K is shown in **Figures S29** and **S30**, respectively.<sup>27</sup> The materials are referenced by a short name followed by a number corresponding to the reported BET surface area: ZTC3806<sup>18</sup>, CA3771<sup>28</sup>, AX2664, MSC3476, KUA2887, and ZTC3035<sup>10</sup>, MSC3420<sup>29</sup>, MSC3244 and ZTC3591<sup>17</sup>, MSC2680 and ZTC3800<sup>30</sup>, MSC3305, MSP2363, and SA2204<sup>31</sup>, and CAC3711 and ZTC3751<sup>16</sup>, the latter of which is referred to elsewhere herein simply as “ZTC” or “FAU-ZTC”.

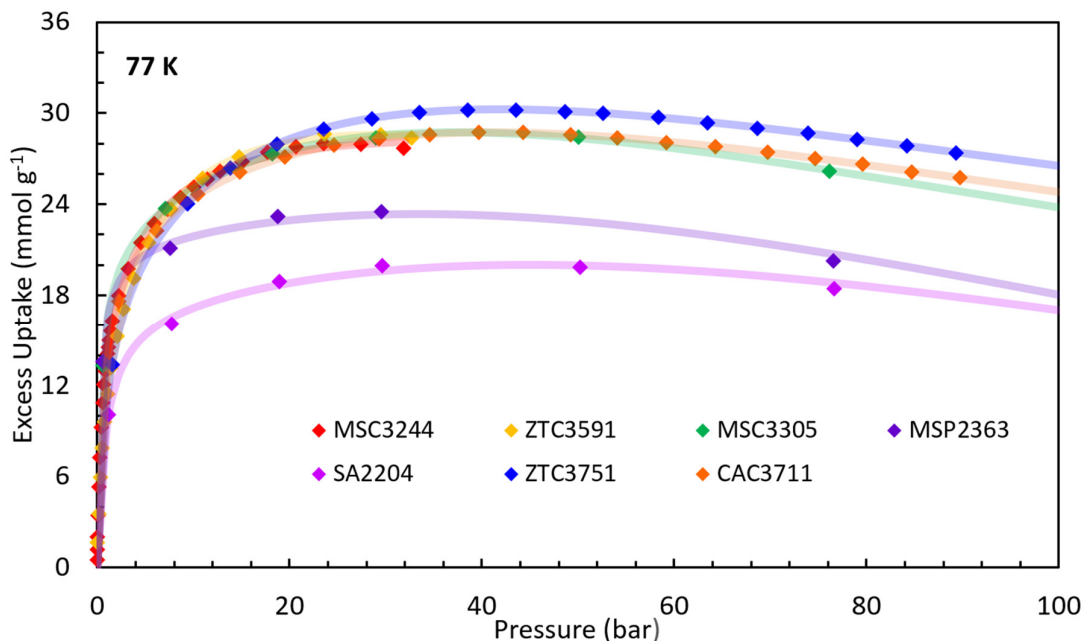

**Figure S29.** Excess H<sub>2</sub> adsorption uptake on porous carbon powders at 77 K.

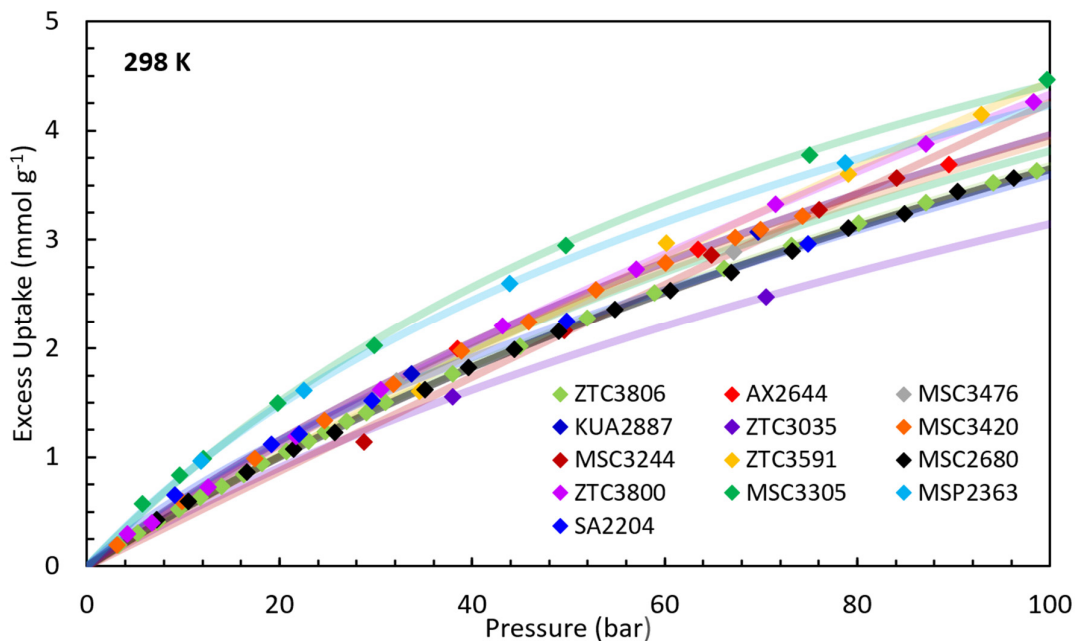

**Figure S30.** Excess H<sub>2</sub> adsorption uptake on porous carbon powders at 298 K.

The total volumetric H<sub>2</sub> storage and delivery by porous carbon powders depends significantly on packing density; a controlled comparison is shown in **Figures S31** and **S32** where, purely for sake of apples-to-apples analysis, the packing density is fixed at 0.2 g mL<sup>-1</sup>, the skeletal density is fixed at 2.1 g mL<sup>-1</sup>, and the skeletal approximation is employed. This is merely an approximation and it is well-recognized that the tap density of carbon powders varies with gravimetric surface area (as shown by the grey x's in **Figure 3a**). Therefore, it must be emphasized that the calculations of H<sub>2</sub> delivery shown in **Figures S31** and **S32** are to be interpreted with caution.

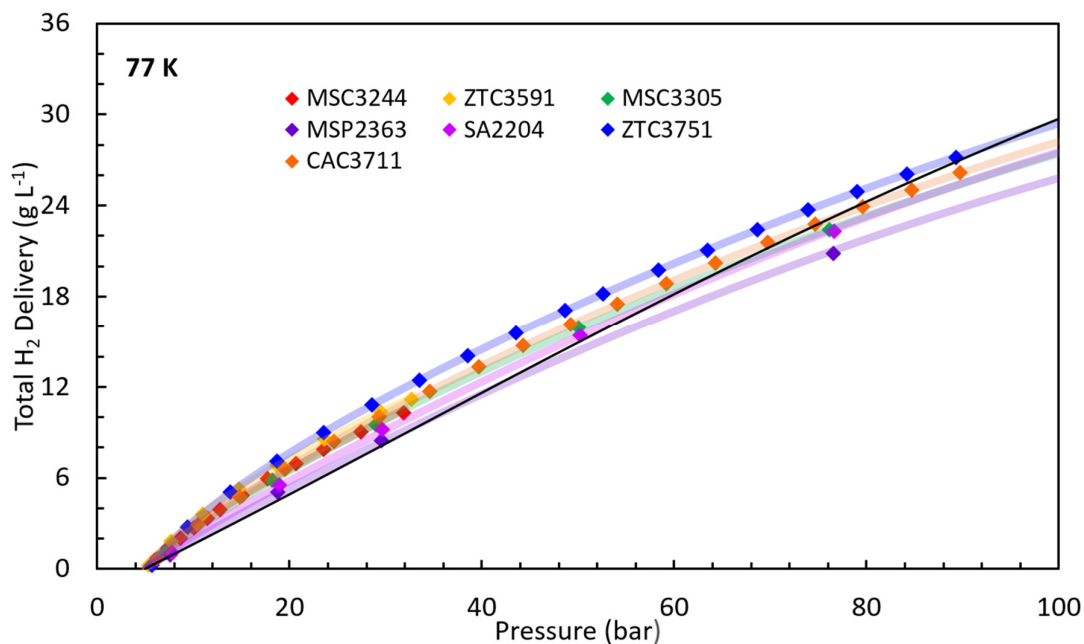

**Figure S31.** Total H<sub>2</sub> delivery on porous carbon powders ( $\rho_{bulk} = 0.2$  g mL<sup>-1</sup>,  $\rho_{skel} = 2.1$  g mL<sup>-1</sup>) at 77 K.

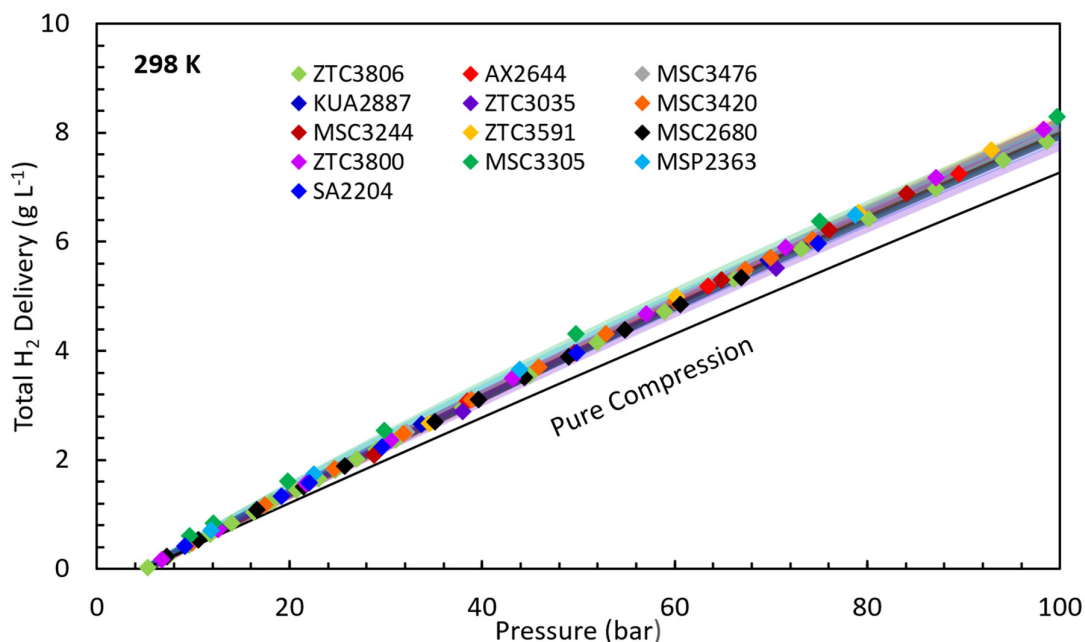

**Figure S32.** Total H<sub>2</sub> delivery on porous carbon powders ( $\rho_{bulk} = 0.2$  g mL<sup>-1</sup>,  $\rho_{skel} = 2.1$  g mL<sup>-1</sup>) at 298 K.

## S7. Supporting References

1. Bénard, P.; Chahine, R.; Chandonia, P.; Cossement, D.; Dorval-Douville, G.; Lafi, L.; Lachance, P.; Paggiaro, R.; Poirier, E., Comparison of hydrogen adsorption on nanoporous materials. *J. Alloys Compd.* **2007**, *446*, 380-384.
2. Ming, Y.; Purewal, J.; Sudik, A.; Xu, C.; Yang, J.; Veenstra, M.; Rhodes, K.; Soltis, R.; Warner, J.; Gaab, M., Thermophysical properties of MOF-5 powders. *Microporous Mesoporous Mater.* **2014**, *185*, 235-244.
3. Kaye, S. S.; Dailly, A.; Yaghi, O. M.; Long, J. R., Impact of preparation and handling on the hydrogen storage properties of  $\text{Zn}_4\text{O}(\text{1, 4-benzenedicarboxylate})_3$  (MOF-5). *J. Am. Chem. Soc.* **2007**, *129* (46), 14176-14177.
4. Wong-Foy, A. G.; Matzger, A. J.; Yaghi, O. M., Exceptional  $\text{H}_2$  saturation uptake in microporous metal-organic frameworks. *J. Am. Chem. Soc.* **2006**, *128* (11), 3494-3495.
5. Purewal, J.; Liu, D.; Yang, J.; Sudik, A.; Siegel, D.; Maurer, S.; Müller, U., Increased volumetric hydrogen uptake of MOF-5 by powder densification. *Int. J. Hydrogen Energy* **2012**, *37* (3), 2723-2727.
6. Rowsell, J. L.; Millward, A. R.; Park, K. S.; Yaghi, O. M., Hydrogen sorption in functionalized metal-organic frameworks. *J. Am. Chem. Soc.* **2004**, *126* (18), 5666-5667.
7. Purewal, J.; Liu, D.; Sudik, A.; Veenstra, M.; Yang, J.; Maurer, S.; Müller, U.; Siegel, D. J., Improved hydrogen storage and thermal conductivity in high-density MOF-5 composites. *J. Phys. Chem. C* **2012**, *116* (38), 20199-20212.
8. Zacharia, R.; Cossement, D.; Lafi, L.; Chahine, R., Volumetric hydrogen sorption capacity of monoliths prepared by mechanical densification of MOF-177. *J. Mater. Chem.* **2010**, *20* (11), 2145.
9. Dailly, A.; Poirier, E., Evaluation of an industrial pilot scale densified MOF-177 adsorbent as an on-board hydrogen storage medium. *Energy Environ. Sci.* **2011**, *4* (9), 3527-3534.
10. Voskuilen, T.; Pourpoint, T.; Dailly, A., Hydrogen adsorption on microporous materials at ambient temperatures and pressures up to 50 MPa. *Adsorption* **2012**, *18*, 239-249.
11. Purewal, J.; Veenstra, M.; Tamburello, D.; Ahmed, A.; Matzger, A. J.; Wong-Foy, A. G.; Seth, S.; Liu, Y.; Siegel, D. J., Estimation of system-level hydrogen storage for metal-organic frameworks with high volumetric storage density. *Int. J. Hydrogen Energy* **2019**, *44* (29), 15135-15145.
12. Kapelewski, M. T.; Runčevski, T. e.; Tarver, J. D.; Jiang, H. Z.; Hurst, K. E.; Parilla, P. A.; Ayala, A.; Gennett, T.; FitzGerald, S. A.; Brown, C. M., Record High Hydrogen Storage Capacity in the Metal-Organic Framework  $\text{Ni}_2(\text{m-dobdc})$  at Near-Ambient Temperatures. *Chem. Mater.* **2018**, *30* (22), 8179-8189.
13. Bambalaza, S. E.; Langmi, H. W.; Mokaya, R.; Musyoka, N. M.; Ren, J.; Khotseng, L. E., Compaction of a zirconium metal-organic framework (UiO-66) for high density hydrogen storage applications. *J. Mater. Chem. A* **2018**, *6* (46), 23569-23577.
14. García-Holley, P.; Schweitzer, B.; Islamoglu, T.; Liu, Y.; Lin, L.; Rodriguez, S.; Weston, M. H.; Hupp, J. T.; Gómez-Gualdrón, D. A.; Yildirim, T., Benchmark study of hydrogen storage in metal-organic frameworks under temperature and pressure swing conditions. *ACS Energy Lett.* **2018**, *3* (3), 748-754.
15. Blanita, G.; Mihet, M.; Borodi, G.; Misan, I.; Coldea, I.; Lupu, D., Ball milling and compression effects on hydrogen adsorption by MOF:Pt/carbon mixtures. *Microporous Mesoporous Mater.* **2015**, *203*, 195-201.
16. Geng, Z.; Zhang, C.; Wang, D.; Zhou, X.; Cai, M., Pore size effects of nanoporous carbons with ultra-high surface area on high-pressure hydrogen storage. *J. Energy Chem.* **2015**, *24* (1), 1-8.
17. Stadie, N. P.; Vajo, J. J.; Cumberland, R. W.; Wilson, A. A.; Ahn, C. C.; Fultz, B., Zeolite-templated carbon materials for high-pressure hydrogen storage. *Langmuir* **2012**, *28*, 10057-10063.
18. Gabe, A.; Ouzzine, M.; Taylor, E. E.; Stadie, N. P.; Uchiyama, N.; Kanai, T.; Nishina, Y.; Tanaka, H.; Pan, Z.-Z.; Kyotani, T.; Nishihara, H., High-density monolithic pellets of double-sided graphene fragments based on zeolite-templated carbon. *J. Mater. Chem. A* **2021**, *9* (12), 7503-7507.
19. Chahine, R.; Bose, T., Low-pressure adsorption storage of hydrogen. *Int. J. Hydrogen Energy* **1994**, *19* (2), 161-164.

20. Streb, A.; Mazzotti, M., Adsorption for efficient low carbon hydrogen production: part 1—adsorption equilibrium and breakthrough studies for H<sub>2</sub>/CO<sub>2</sub>/CH<sub>4</sub> on zeolite 13X. *Adsorption* **2021**, 1–18.
21. Grazulis, S.; Chateigner, D.; Downs, R. T.; Yokochi, A. F. T.; Quiros, M.; Lutterotti, L.; Manakova, E.; Butkus, J.; Moeck, P.; Le Bail, A., Crystallography Open Database - an open-access collection of crystal structures. *J. Appl. Crystallogr.* **2009**, 42 (4), 726–729.
22. Baerlocher, C.; McCusker, L. B. Database of Zeolite Structures. <http://www.iza-structure.org/databases/>.
23. Taylor, E. E.; Garman, K.; Stadie, N. P., Atomistic Structures of Zeolite-Templated Carbon. *Chem. Mater.* **2020**, 32 (7), 2742–2752.
24. Nomura, K.; Nishihara, H.; Yamamoto, M.; Gabe, A.; Ito, M.; Uchimura, M.; Nishina, Y.; Tanaka, H.; Miyahara, M. T.; Kyotani, T., Force-driven reversible liquid–gas phase transition mediated by elastic nanosponges. *Nat. Commun.* **2019**, 10, 2559.
25. Willems, T. F.; Rycroft, C. H.; Kazi, M.; Meza, J. C.; Haranczyk, M., Algorithms and tools for high-throughput geometry-based analysis of crystalline porous materials. *Microporous Mesoporous Mater.* **2012**, 149 (1), 134–141.
26. Bae, Y.-S.; Yazaydin, A. O. z. r.; Snurr, R. Q., Evaluation of the BET method for determining surface areas of MOFs and zeolites that contain ultra-micropores. *Langmuir* **2010**, 26 (8), 5475–5483.
27. Casco, M. E.; Martínez-Escandell, M.; Gadea-Ramos, E.; Kaneko, K.; Silvestre-Albero, J.; Rodríguez-Reinoso, F., High-Pressure Methane Storage in Porous Materials: are Carbon Materials in the Pole Position? *Chem. Mater.* **2015**.
28. Blankenship, T. S.; Mokaya, R., Cigarette butt-derived carbons have ultra-high surface area and unprecedented hydrogen storage capacity. *Energy Environ. Sci.* **2017**, 10 (12), 2552–2562.
29. Stadie, N. P.; Purewal, J. J.; Ahn, C. C.; Fultz, B., Measurements of hydrogen spillover in platinum doped superactivated carbon. *Langmuir* **2010**, 26 (19), 15481–15485.
30. Nishihara, H.; Hou, P. X.; Li, L. X.; Ito, M.; Uchiyama, M.; Kaburagi, T.; Ikura, A.; Katamura, J.; Kawarada, T.; Mizuuchi, K.; Kyotani, T., High-pressure hydrogen storage in zeolite-templated carbon. *J. Phys. Chem. C* **2009**, 113 (8), 3189–3196.
31. Ramirez-Vidal, P.; Canevesi, R. L.; Sdanghi, G.; Schaefer, S.; Maranzana, G.; Celzard, A.; Fierro, V., A Step Forward in Understanding the Hydrogen Adsorption and Compression on Activated Carbons. *ACS Appl. Mater. Inter.* **2021**, 13 (10), 12562–12574.
